# Supplementary material for: The optical and magnetic properties of CoO and Co nanocrystals prepared by a facile technique
Source: Royal Society of Chemistry journal article supplement (doi:10.1039/c3nr01971c), 2013-01-01
Supplement: c3nr01971c.pdf [file c3nr01971c.pdf]

**Supplementary Information for:**

**The Optical and Magnetic Properties of CoO and Co  
Nanocrystals Prepared by a Facile Technique**

*Qilin Dai and Jinke Tang\**

Department of Physics & Astronomy, University of Wyoming, Laramie, WY 82071,

USA

Email: [jtang2@uwyo.edu](mailto:jtang2@uwyo.edu)

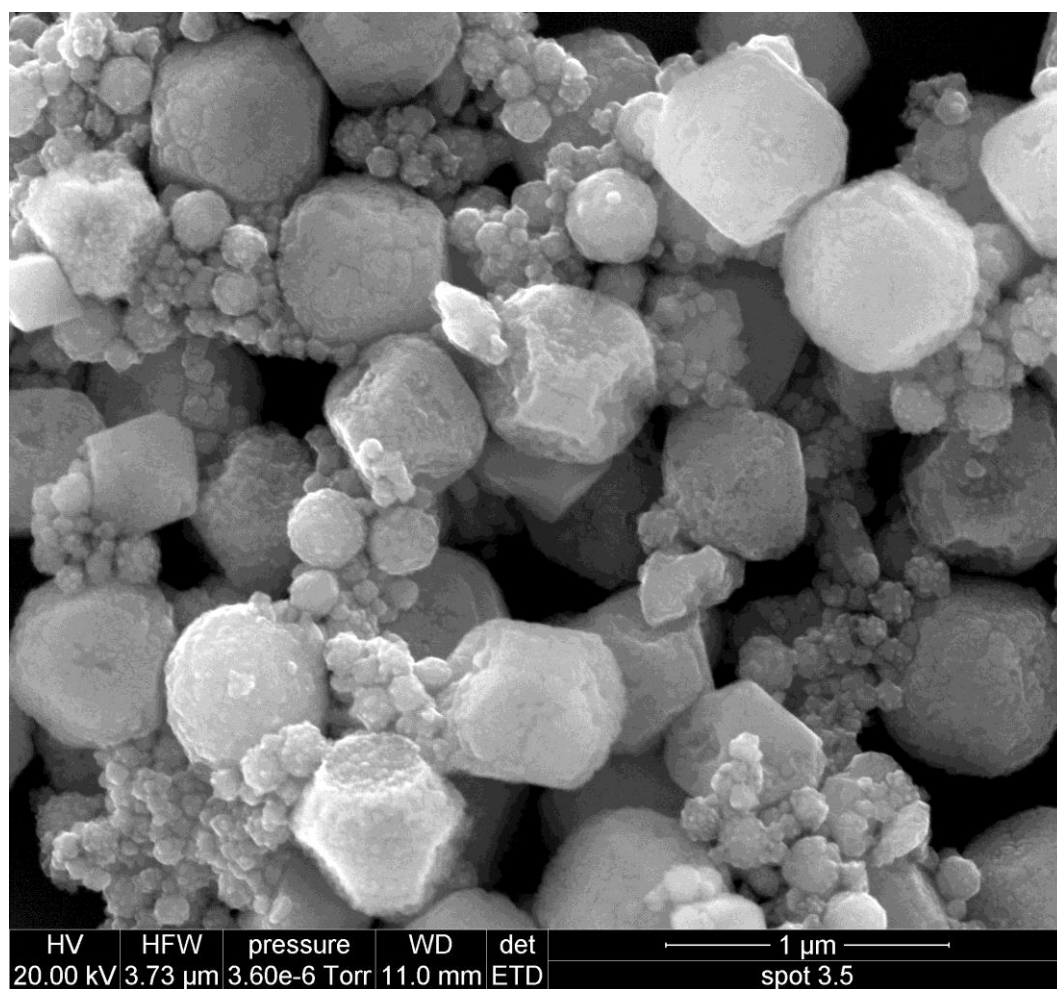

Figure S1: the FESEM image of S4Black
